# Supplementary material for: Functional changes in Becker muscular dystrophy: implications for clinical trials in dystrophinopathies
Source: PubMed Central journal article supplement (PMC5007528; doi:10.1038/srep32439), 2016-09-01
Supplement: srep32439-s1.pdf [file srep32439-s1.pdf]

**Supplementary information for the paper:**

**“Functional changes in Becker muscular dystrophy:  
implications for clinical trials in dystrophinopathies”**

Luca Bello, MD, PhD<sup>1</sup>; Paola Campadello, MD<sup>1</sup>; Andrea Barp, MD<sup>1</sup>; Marina Fanin, PhD<sup>1</sup>; Claudio Semplicini, MD<sup>1</sup>; Gianni Sorarù, MD, PhD<sup>1</sup>; Luca Caumo<sup>1</sup>; Chiara Calore, MD, PhD<sup>2</sup>; Corrado Angelini, MD<sup>1</sup>; Elena Pegoraro, MD, PhD<sup>1\*</sup>.

<sup>1</sup>Department of Neurosciences, University of Padova, Padova, Italy

<sup>2</sup>Department of Cardiac, Thoracic and Vascular Sciences, Cardiology Clinic, University of Padova, Padova, Italy

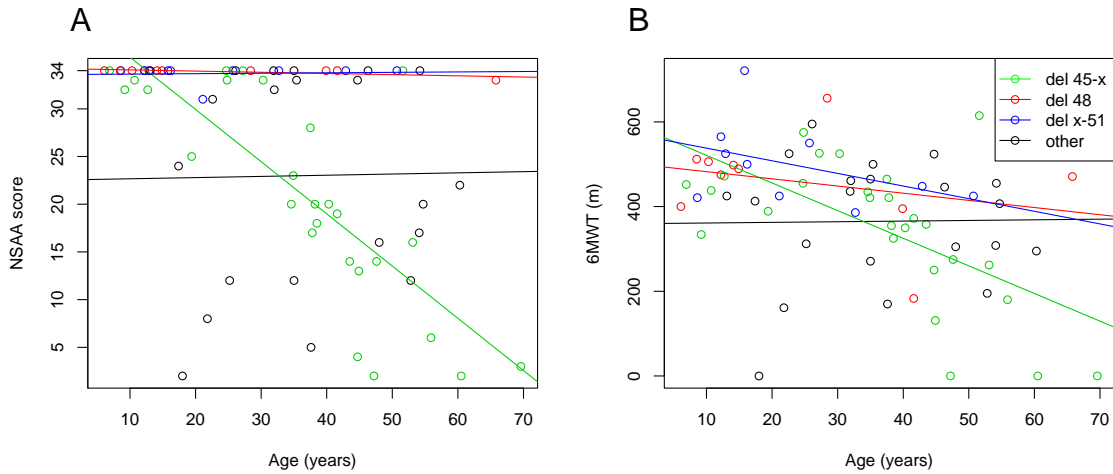

**Supplementary Fig. 1. Different slopes of NSAA and 6MWT plotted against age between mutation groups.** There is a downward slope of baseline NSAA values plotted against age in the “del 45-x” group, while baseline NSAA appears stable at the high scores for “del 48” and “del x-51” (Panel A). There is a similar behaviour of 6MWT values, with a steeper downward slope in “del 45-x” compared to “del 48” and “del x-51” (Panel B). Values in “other” mutations are more variable (i.e. this group is more heterogeneous and includes both mild and severe patients).

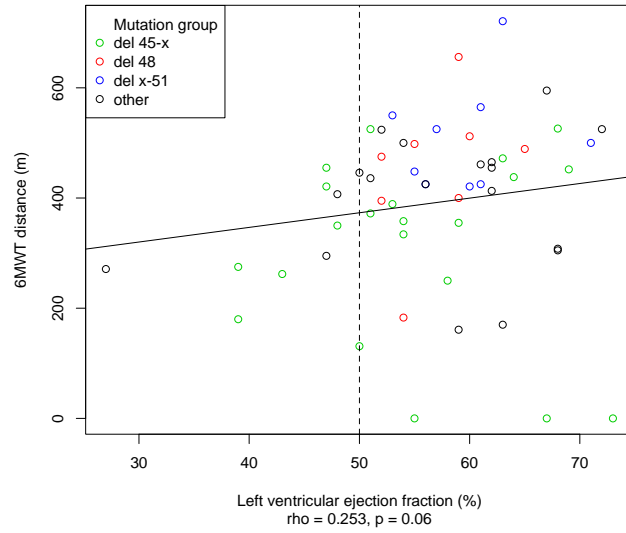

**Supplementary Fig. 2. Scatter plots of 6MWT distance and left ventricular ejection fraction.** There is a trend towards a positive correlation between 6MWT distance and left ventricular ejection fraction (obtained within 1 year of functional evaluation).
